# Supplementary material for: Solution-processed efficient deep-blue fluorescent organic light-emitting diodes based on novel 9,10-diphenyl-anthracene derivatives
Source: Royal Society of Chemistry journal article supplement (doi:10.1039/c5ra00627a), 2015-01-01
Supplement: c5ra00627a1.pdf [file c5ra00627a1.pdf]

# Supporting Information

## Solution-processed Efficient Deep-Blue Fluorescent Organic Light-

## Emitting Diodes Based On Novel 9,10-diphenyl-anthracene

### Derivatives

Zhaohang Zhang,<sup>a</sup> Wei Jiang,<sup>\*a</sup> Xinxin Ban,<sup>a</sup> Min Yang,<sup>a</sup> Shanghui Ye,<sup>\*b</sup> Bin Huang,

<sup>a</sup> and Yueming Sun,<sup>\*a</sup>

<sup>a</sup> School of Chemistry and Chemical Engineering, Southeast University, Nanjing, 210096, Jiangsu, P. R. China

<sup>b</sup> Institute of Advanced Materials (IAM) Nanjing University of Posts & Telecommunications (NUPT), 9 Wenyuan Road, Nanjing, 210023, Jiangsu, P. R. China

Corresponding authors:

\*e-mail: 101011462@seu.edu.cn (W. Jiang); e-mail: iamshye@njupt.edu.cn (S. Ye);

e-mail: sun@seu.edu.cn (Y. Sun)

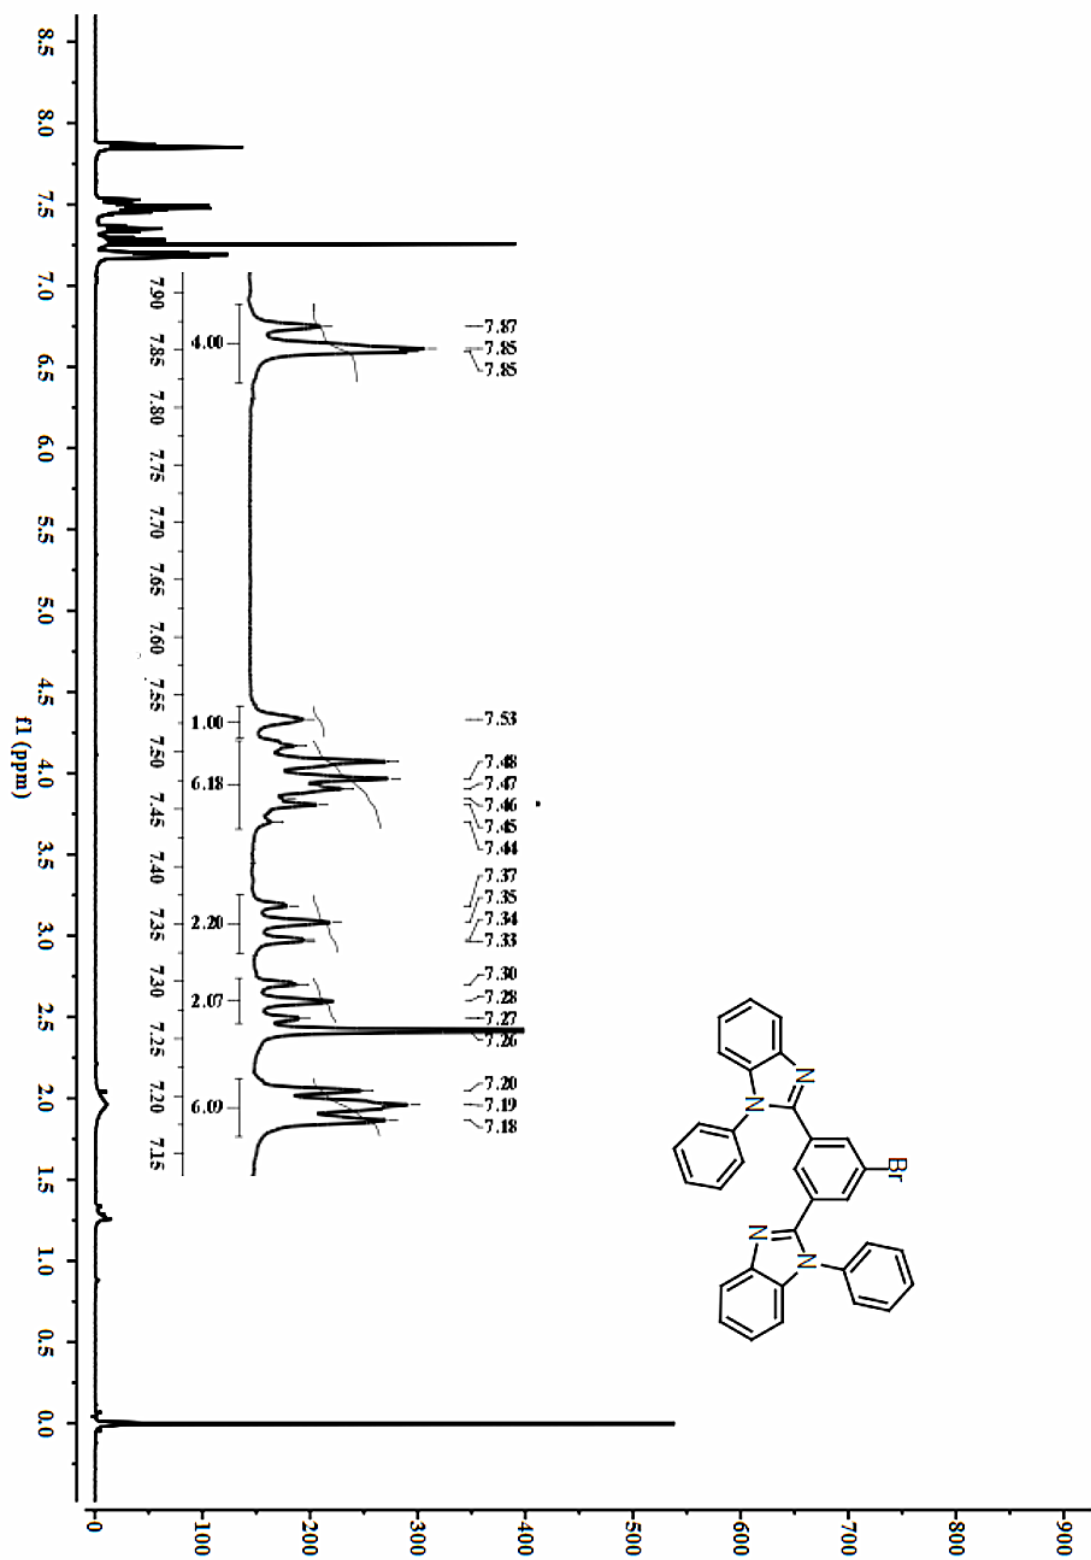

Figure S1. <sup>1</sup>H-NMR of compound 1.

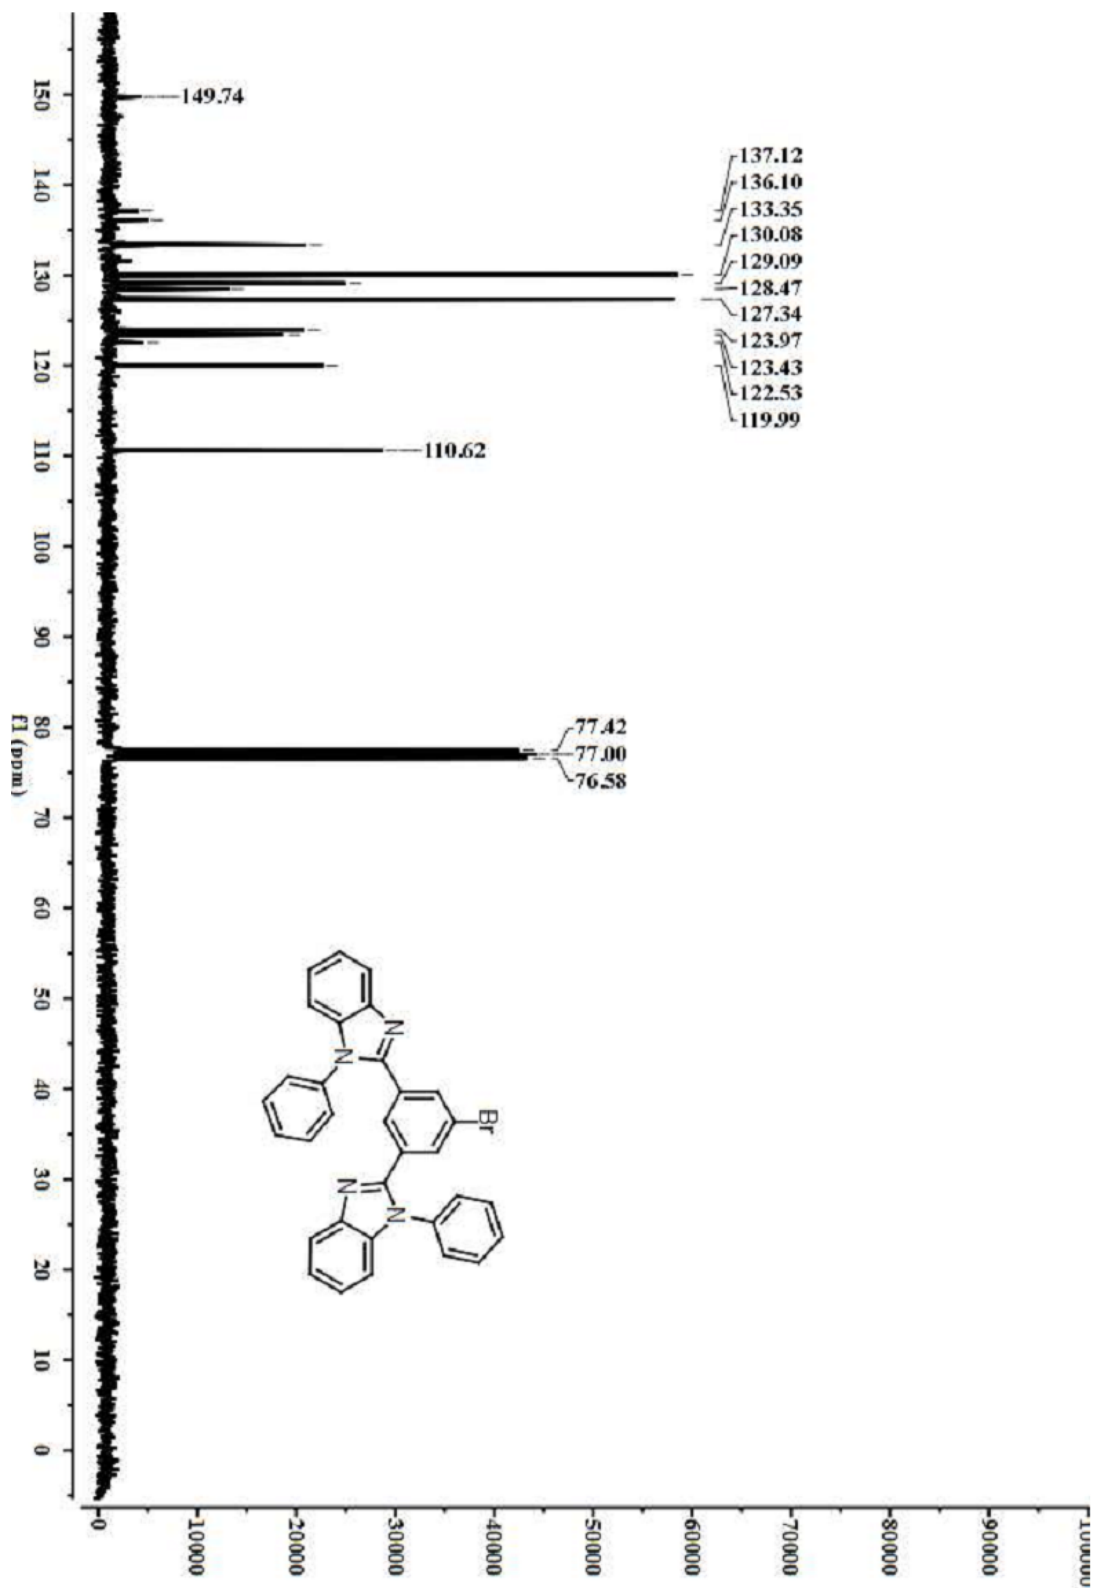

Figure S2.  $^{13}\text{C}$ -NMR of compound 1.

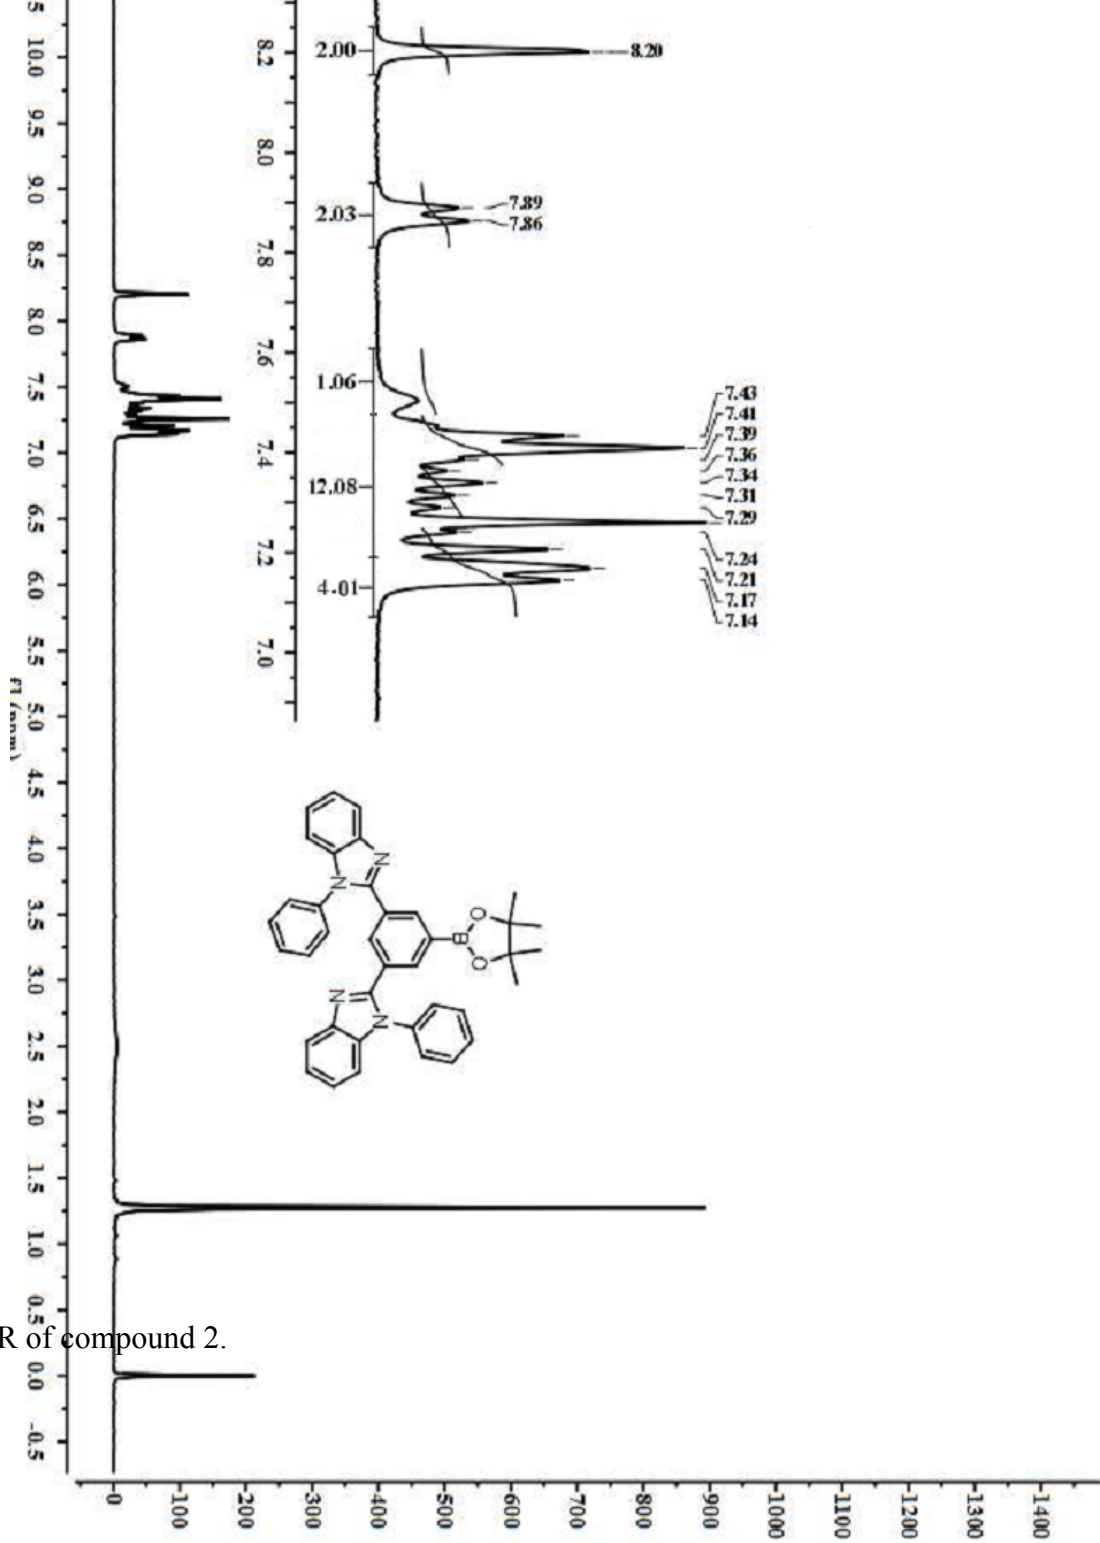

Figure S3. <sup>1</sup>H-NMR of compound 2.

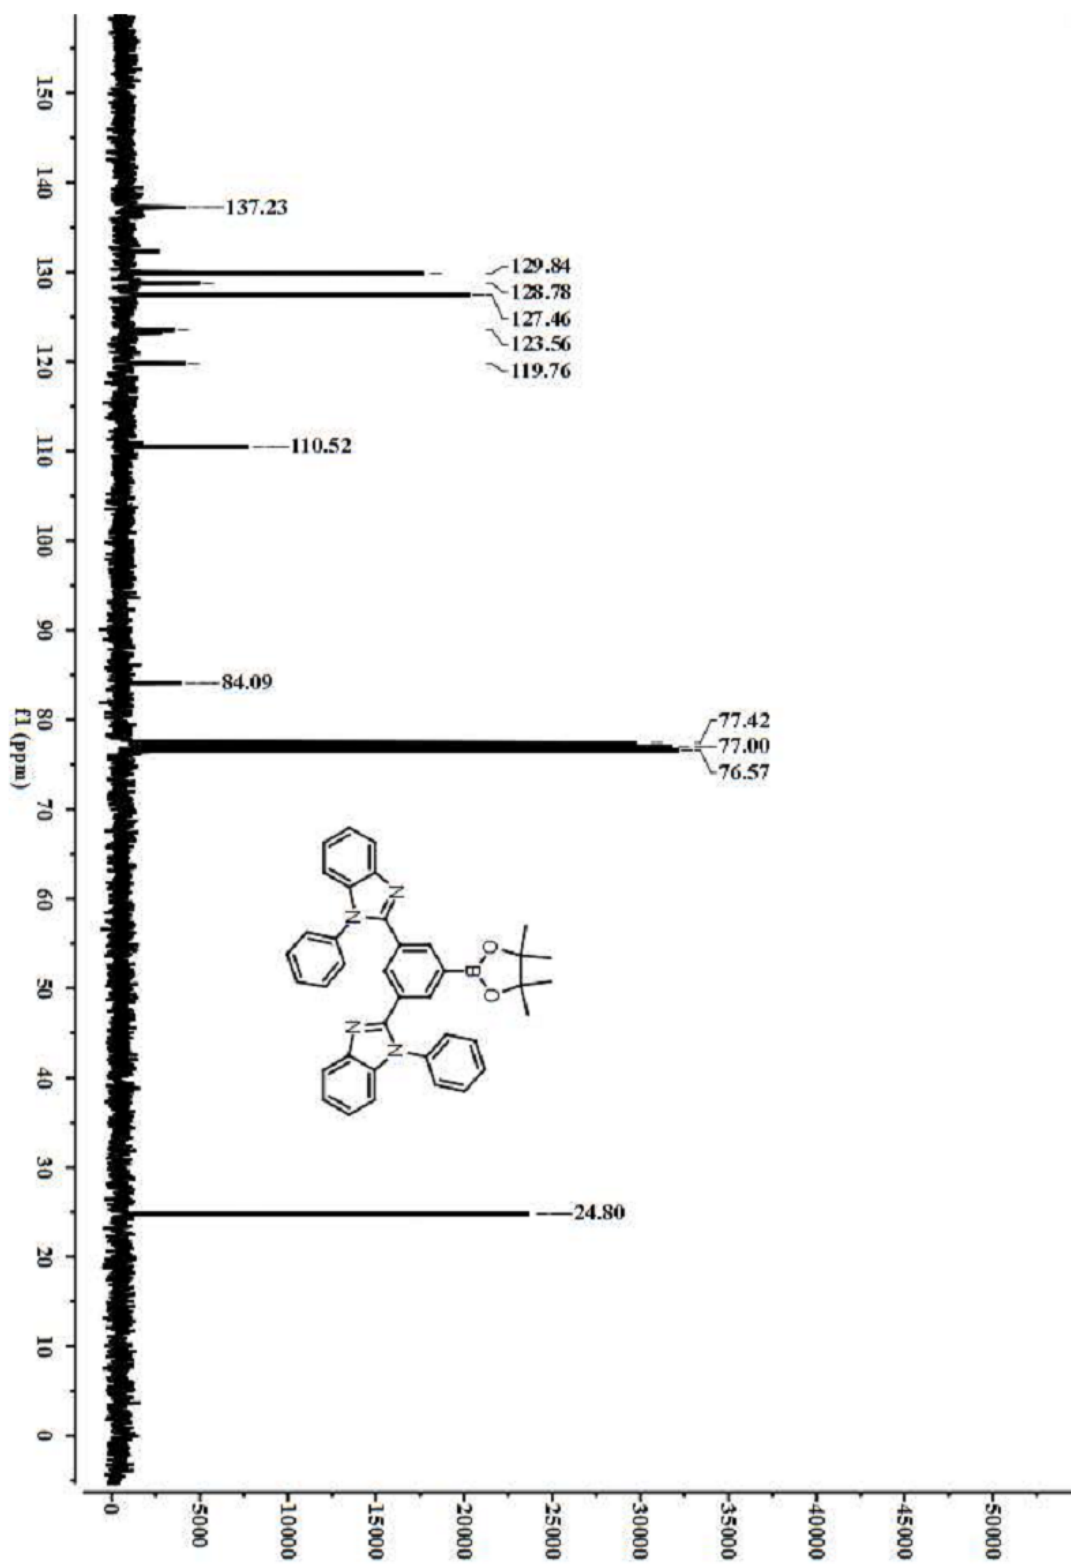

Figure S4.  $^{13}\text{C}$ -NMR of compound 2.
